# Supplementary material for: A supramolecular keypad lock
Source: Royal Society of Chemistry journal article supplement (doi:10.1039/c4cc09336d), 2014-12-22
Supplement: c4cc09336d1.pdf [file c4cc09336d1.pdf]

## **Electronic Supplementary Information (ESI)**

### **A supramolecular keypad lock**

Cátia Parente Carvalho, Zoe Domínguez, José Paulo Da Silva and Uwe Pischel\*

## Materials

3-(*N,N*-Dimethylamino)-1-propylamine (99%), iodomethane ( $\geq 99\%$ ), 1-adamantylamine (97%), and cucurbit[8]uril were purchased from Sigma Aldrich. 2,3-Anthracenedicarboxylic anhydride ( $> 90\%$ ) was supplied by Tokyo Chemical Industry CO., Ltd (TCI). All compounds were used as received. Cucurbit[7]uril was prepared according to a published procedure.<sup>1</sup>

## Synthesis of Dye 1

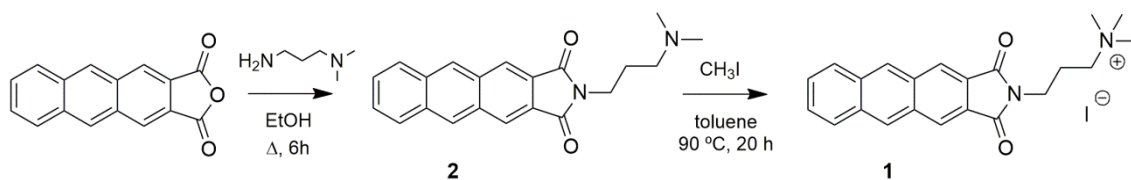

**Scheme S1.** Synthesis of dye 1.

**Synthesis of 2.** A solution of 2,3-anthracenedicarboxylic anhydride (100 mg, 0.40 mmol) and 3-(*N,N*-dimethylamino)-1-propylamine (61.7 mg, 0.60 mmol) in 4 mL ethanol was heated to reflux for 6 h. The resulting solution was concentrated to dryness and the residue was re-dissolved in chloroform (10 mL). The organic layer was washed with water ( $4 \times 10\text{ mL}$ ), dried with anhydrous  $\text{Na}_2\text{SO}_4$ , and then the solvent was evaporated to yield the NMR-pure product 2 as light yellow solid (108 mg, 0.32 mmol) in a yield of 80%.

$^1\text{H}$  NMR ( $\text{CDCl}_3$ , 400 MHz)  $\delta$  1.87–1.95 (m, 2H), 2.23 (s, 6H), 2.39 (t,  $J = 7.2\text{ Hz}$ , 2H), 3.83 (t,  $J = 7.6\text{ Hz}$ , 2H), 7.60–7.65 (m, 2H), 8.05–8.11 (m, 2H), 8.50 (s, 2H), 8.63 (s, 2H) ppm.  $^{13}\text{C}$  NMR ( $\text{CDCl}_3$ , 100 MHz)  $\delta$  26.7, 36.8, 45.5, 57.2, 125.9, 126.9, 127.6, 128.6, 130.2, 132.1, 133.4, 168.0 ppm.

**Synthesis of 1.** To solution of **2** (100 mg, 0.30 mmol) in toluene (4 mL) dry iodomethane (213.5 mg, 1.50 mmol) was added under stirring and the mixture was then heated under exclusion of light at 90 °C for 20 h. After removal of all volatiles, dye **1** was obtained as light yellow solid (124 mg, 0.26 mmol) in 87% yield.

$^1\text{H}$  NMR  $[(\text{CD}_3)_2\text{SO}, 400 \text{ MHz}]$   $\delta$  2.05–2.17 (m, 2H), 3.04 (s, 9H), 3.38–3.45 (m, 2H), 3.75 (t,  $J = 6.4 \text{ Hz}$ , 2H), 7.68–7.73 (m, 2H), 8.18–8.23 (m, 2H), 8.70 (s, 2H), 8.95 (s, 2H) ppm.  $^{13}\text{C}$  NMR ( $\text{CDCl}_3$ , 100 MHz)  $\delta$  22.0, 34.9, 52.2, 63.0, 125.6, 126.6, 127.7, 128.4, 130.1, 131.6, 132.7, 167.4 ppm. MS (ESI)  $m/z$  calcd  $\text{M}^+$ : 347.1754; found: 347.1751.

## Methods

**General.** All measurements and photoreactions were performed with freshly prepared air-equilibrated aqueous solutions at room temperature. The pH of the solutions was adjusted to pH 7 by the addition of sodium hydroxide and controlled during the titration experiments with a pH meter (model HI221, HANNA Instruments). NMR measurements were done on an Agilent 400 MHz spectrometer.

**Photophysical Measurements.** All photophysical measurements were done in quartz cuvettes with 1 cm optical path length. The UV/vis absorption spectra were recorded with a UV-1603 spectrophotometer from Shimadzu. Steady-state fluorescence measurements were recorded on a Cary Eclipse fluorimeter from Varian. The fluorescence quantum yield was determined by employing quinine sulfate in 0.05 M  $\text{H}_2\text{SO}_4$  as standard ( $\Phi_f = 0.55$ ).<sup>2, 3</sup> Time-resolved fluorescence measurements were performed with a time-correlated single-photon-counting setup from Edinburgh Instruments (FLS 920) using a picosecond pulsed diode laser EPL-445 ( $\lambda_{\text{exc}} = 442.2 \text{ nm}$ ,

pulse width 78.3 ps) as excitation source. The deconvolution analysis of the decay curve yielded the corresponding fluorescence lifetime.

**Irradiations.** A 150 W Xenon Lamp (Oriel GmbH & Co. KG) was used as light source for the photodimerization of **1**. The irradiation light was passed through a 395-nm optical cut-off filter. For the cycloreversion of the photodimer a hand-held UV lamp with output at 254 nm (VL-4.LC, 4 W) was used.

**Complexation Studies.** The titration experiments were done by administering aliquots of stock solutions of the cucurbituril macrocycles (CB7 or CB8) to solutions containing the guest dye **1**. The water content of the samples of the organic macrocycles was determined according to published procedures.<sup>4</sup> The excitation wavelength in the fluorescence titration was chosen to coincide with an isosbestic point of the UV/vis absorption titration. The fitting of the titration curves was done with a 1:1 or 1:2 complexation model, as described in the literature.<sup>5, 6</sup> The Job plot was obtained for a constant total (host and guest) concentration of 20  $\mu$ M.

**Liquid Chromatography with Diode-Array and Mass-Spectrometric Detection.**

The chromatographic separation was achieved using an Hamilton PRP-1 reversed phase column (15.0 cm length, 2.1 mm internal diameter, 5  $\mu$ m particle diameter), stabilized at 25 °C. The mobile phase consisted of water (H<sub>2</sub>O) and acetonitrile (MeCN), both with 0.1% of formic acid at 0.4 mL/min flow. Two gradient programs were used. In the first program the mobile phase started with 95% of H<sub>2</sub>O and 5% of MeCN and then changed to 0% of H<sub>2</sub>O and 100% of MeCN within 10 minutes. This composition was kept for 4 minutes and then the initial composition was recovered within 0.5 minutes and stabilized for additional 5 minutes before the next run. In the second program the mobile phase started with 95% of H<sub>2</sub>O and 5% of MeCN, was changed to 70% of H<sub>2</sub>O and 30% of MeCN within 25 minutes and then to 0% of H<sub>2</sub>O and 100% of MeCN

within 5 minutes. This composition was kept for 4 minutes, then the initial composition was recovered within 0.5 minutes, and finally stabilized for additional 5 minutes before the next run.

The LC-MS system is an Agilent Technologies 1200 Series LC, equipped with a photodiode array detector (DAD) and coupled to a Bruker Daltonics HCT ultra (ion trap). The UV/Vis absorption spectra of the separated products were obtained using the DAD. LC-DAD traces were acquired at 300 nm. The parameters of the electrospray-ionization mass spectrometry detection were set as follows: polarity, positive; capillary voltage,  $-4.0$  kV; capillary exit voltage, 180 V; skimmer voltage, 60 V; temperature of drying gas, 330 °C; nebulizer gas pressure, 40 psi; drying gas flow, 8 L/min.

**Detection of Host-Guest Complexes in the Gas Phase.** The mass spectrometric experiments to identify the **1•1•CB8** complex were performed with a Bruker Daltonics HCT ultra mass spectrometer (ion trap), equipped with an electrospray ionization source (Agilent) that utilized a nickel-coated glass capillary with an inner diameter of 0.6 mm. The ions were continuously generated by infusing the aqueous solution sample into the source with a syringe pump (KdScientific, model 781100, USA) at a flow rate of 4  $\mu$ L/min. The parameters used to detect host-guest complexes in the gas phase were typically as follows: polarity, positive; capillary voltage,  $-4.0$  kV; capillary exit voltage, 20 V; skimmer voltage, 100 V; temperature of drying gas, 300 °C; nebulizer gas pressure, 20 psi; drying gas flow, 5 L/min.

## Electrospray Ionization Mass Spectrometry of the 1•1•CB8 Complex

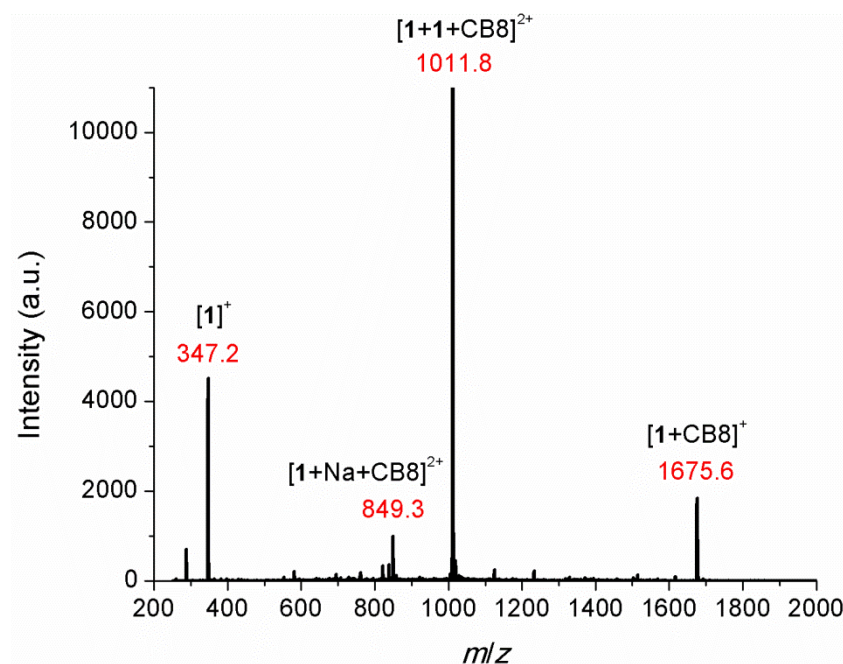

**Figure S1.** Electrospray ionization mass spectrum of a mixture of **1** (30  $\mu$ M) and CB8 (15  $\mu$ M) in neutral water.

## Absorption Titration of 1 with CB8

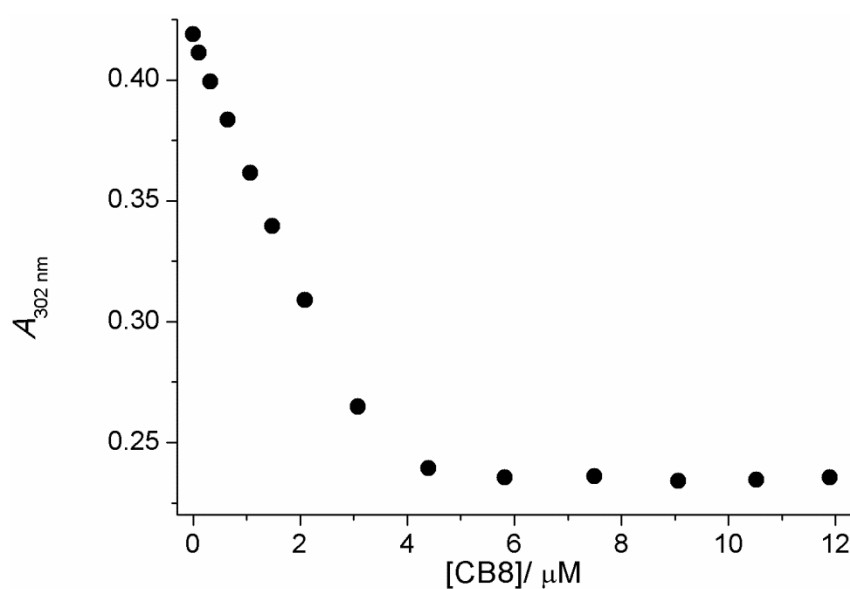

**Figure S2.** UV/vis absorption titration of **1** (10  $\mu$ M) with CB8 in pH-neutral water.

### Job's Plot

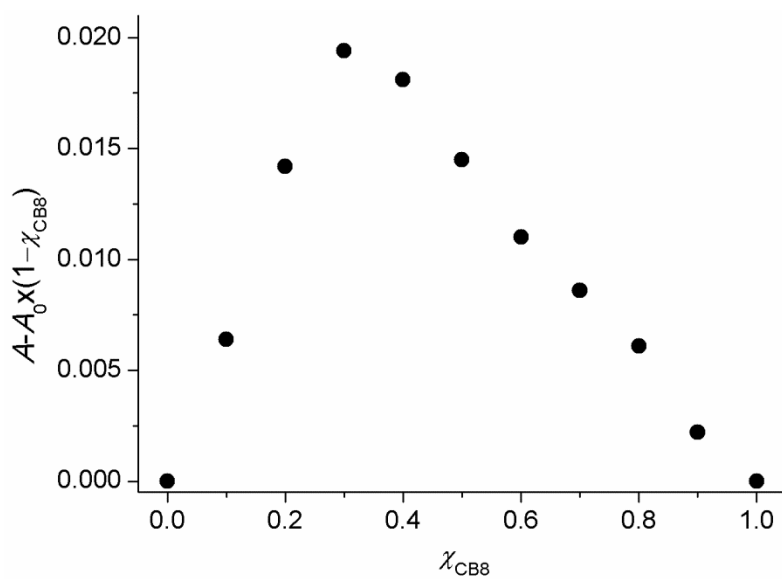

**Figure S3.** Job's plot for the complexation of **1** by CB8; the total concentration of both components was fixed at 20  $\mu$ M.

### Reversible Photoswitching

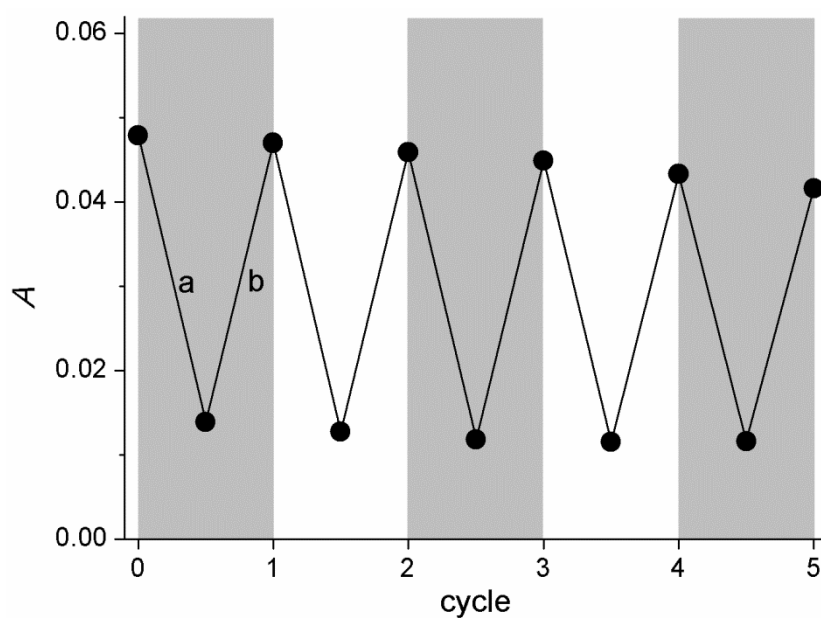

**Figure S4.** Reversible photoswitching of **1** (10  $\mu$ M) in the presence of 0.5 equiv. of CB8 monitored at 418 nm; a: 20 min irradiation at  $> 395$  nm; b: 20 s irradiation at 254 nm.

## Recycling

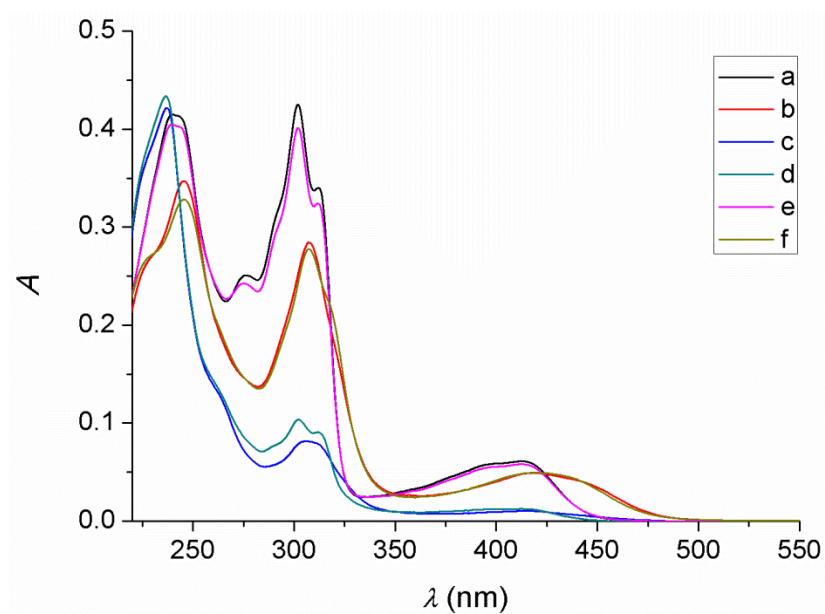

**Figure S5.** UV/vis absorption changes for the recycling of the supramolecular keypad lock. a: 10  $\mu\text{M}$  **1**; b: after addition of CB8 (5  $\mu\text{M}$ ) to solution a; c: after irradiation of solution b at  $>395$  nm for 45 min; d: after addition of 1-aminoadamantane (20  $\mu\text{M}$ ) to solution c; e: after irradiation of solution d at 254 nm for 30 s; f: after addition of CB7 (35  $\mu\text{M}$ ) to solution e. Note that the spectra corresponding to the cases b and f are hardly distinguishable.



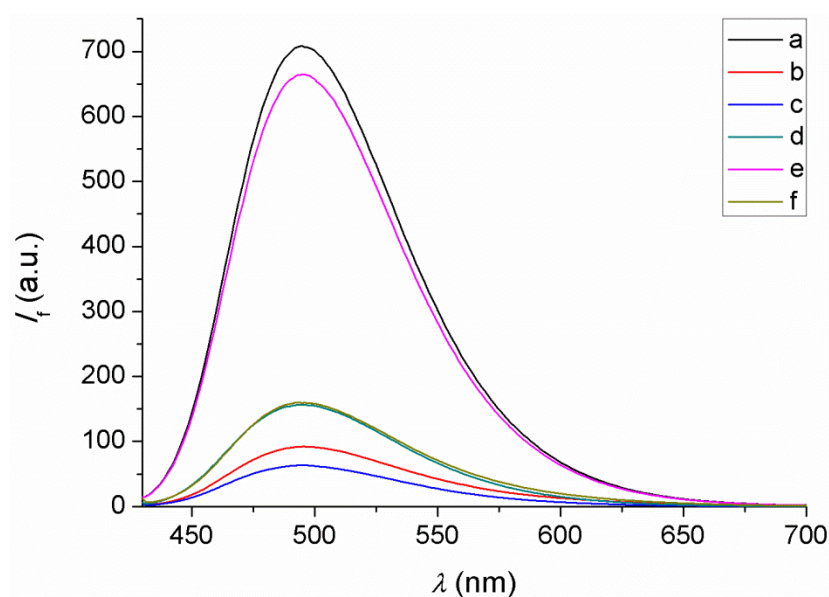

**Figure S6.** Fluorescence changes for the recycling of the supramolecular keypad lock. a: 10  $\mu\text{M}$  **1**; b: after addition of CB8 (5  $\mu\text{M}$ ) to solution a; c: after irradiation of solution b at  $>395$  nm for 45 min; d: after addition of 1-aminoadamantane (20  $\mu\text{M}$ ) to solution c; e: after irradiation of solution d at 254 nm for 30 s; f: after addition of CB7 (35  $\mu\text{M}$ ) to solution e. Note that the spectra corresponding to the cases d and f are hardly distinguishable.

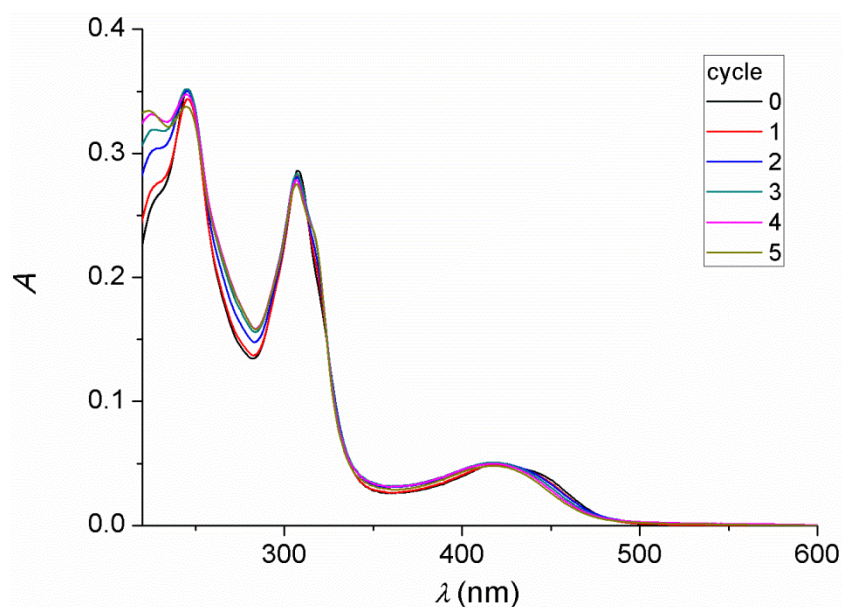

**Figure S7.** Absorption spectra after the final addition of CB7 for several cycles corresponding to the sequences c)-f) shown in Figure S5.

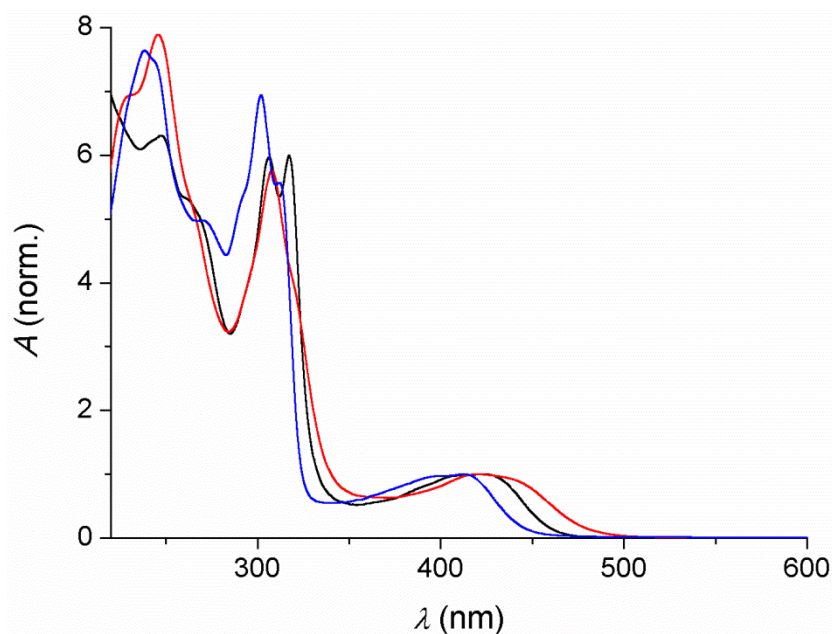

**Figure S8.** Comparison of the UV/vis absorption spectra of dye **1** (blue line), the complex **1•CB7** (black line), and the complex **1•1•CB8** (red line).

**Observations about the recycling process:** As can be seen in Figure S7 the recycling process can be repeated several times (tested for 5 cycles in this work). It has to be taken into consideration that the self-sorting process on addition of CB7 involves a multicomponent mixture with several coupled equilibria, and that CB7 and 1-aminoadamantane are used in excess. Thus, these chemicals accumulate over the various cycles. From a comparison with Figure S8 it can be seen that the characteristic spectral fingerprint of the **1•1•CB8** complex is obtained after completion of each cycle. For the encountered intricate multi-equilibrium situation the reproducibility is very good. However, a loss of ca. 30% of the dye **1** available for recycling is noted over the 5 cycles. This could be probably further improved by optimizing the concentrations of the 4 components (dye **1**, 1-aminoadamantane, CB7, and CB8).

## Liquid Chromatography

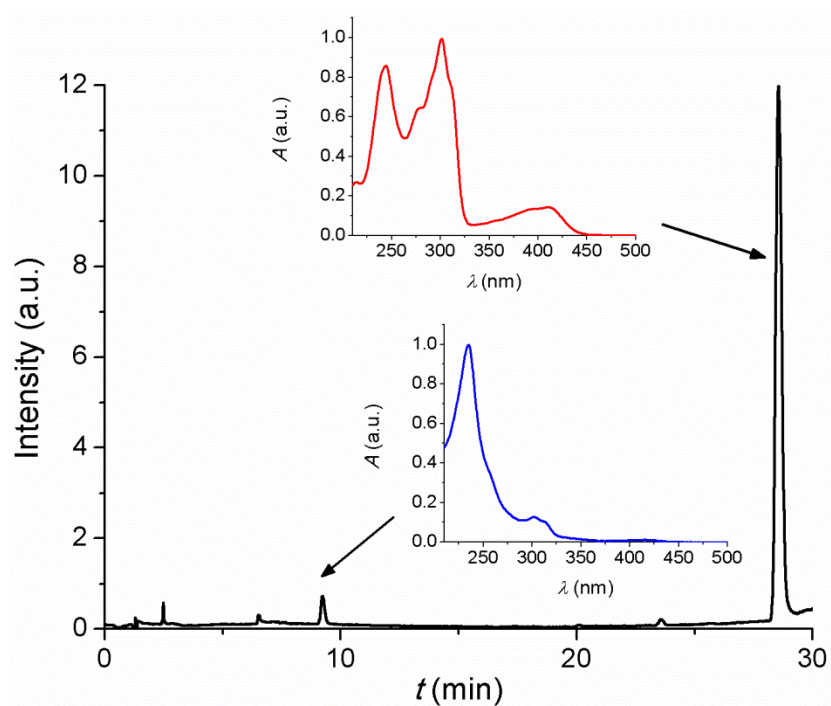

**Figure S9.** LC-DAD chromatogram (observed at 300 nm) after partial photodimerization of **1** in the presence of 0.5 equiv. of CB8 by irradiation at  $>395$  nm. The insets show the UV/vis absorption spectra of **1** (red) and the photodimer **1**<sub>2</sub> (blue), as detected by the DAD.

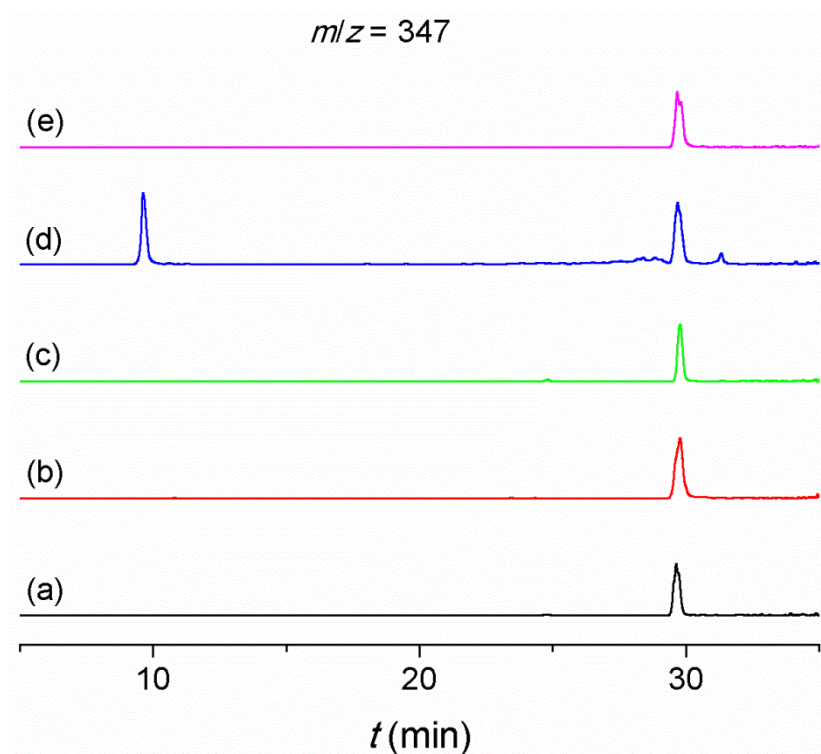

**Figure S10.** Single ion LC-MS traces at  $m/z$  347 of (a) the non-complexed dye **1**, (b) the dye in presence of CB8, (c) after irradiation of the non-complexed dye **1** at  $>395$  nm, (d) after partial photodimerization by irradiation of the complex at  $>395$  nm, (e) after cycloreversion of the complexed dimer by irradiation at 254 nm. The concentrations were adjusted to  $[1] = 30 \mu\text{M}$  and  $[\text{CB8}] = 15 \mu\text{M}$  (whenever present). All solutions were prepared in pH-neutral water. Note that the host-guest complexes do not withstand to the chromatographic separation; only the guests are observed.

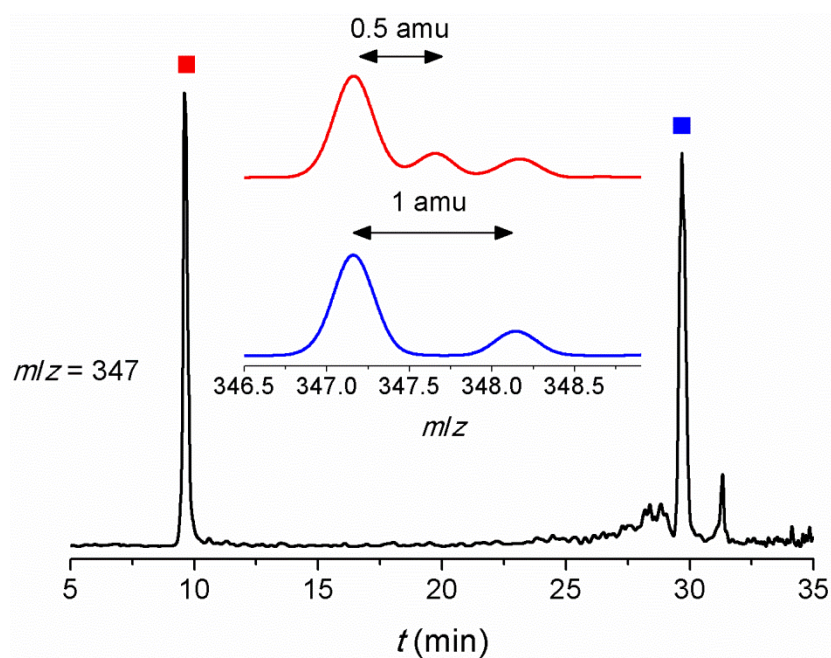

**Figure S11.** Single ion LC-MS trace at  $m/z$  347 observed after irradiation of **1** (30  $\mu\text{M}$ ) in presence of CB8 (15  $\mu\text{M}$ ). The photoreaction was not completed to demonstrate the signals of both the monomer dye and the photodimer. The color-coded inset graphs show the molecular ion peak and the isotope pattern spacing (blue: dye **1**, red: photodimer **1**<sub>2</sub>). Note that the host-guest complexes do not withstand to the chromatographic separation; only the guests are observed.

## NMR Study of Complexation and Photoreactions

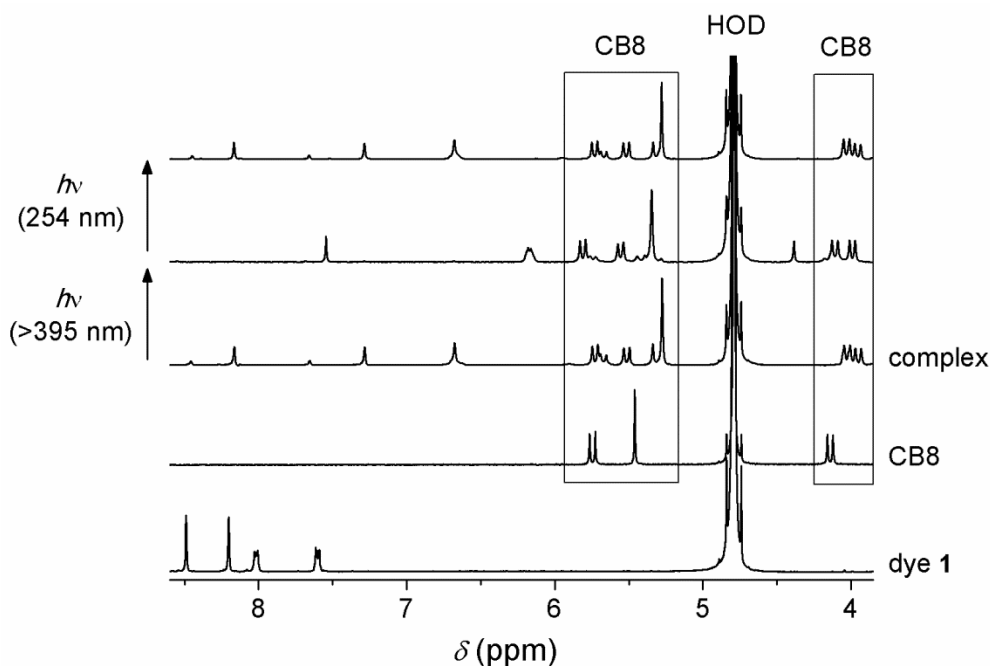

**Figure S12.** Partial <sup>1</sup>H NMR spectra (in D<sub>2</sub>O) of dye **1**, CB8, the mixture of **1** (250  $\mu$ M) and CB8 (125  $\mu$ M), the irradiated (>395 nm for 45 min) mixture, and the mixture after cycloreversion (irradiation at 254 nm for 4 min of the CB8-complexed photodimer that was generated previously by irradiation at >395 nm for 45 min); from bottom to top.

**Additional notes:** In the mixture of dye **1** and CB8 (third spectrum from bottom) two different complexes can be found. The major species (ca. 80%, based on integrations of the aromatic protons) is assigned to the **1•1•CB8** complex. This was independently confirmed by mass spectrometry and Job's plot analysis (see above). The minor species (ca. 20%) is tentatively assigned to the **1•CB8** complex that was also observed in mass spectrometry. A second observation is that for the **1•1•CB8** complex some symmetry distortion of the portal methylene protons is noted.

## NMR spectra

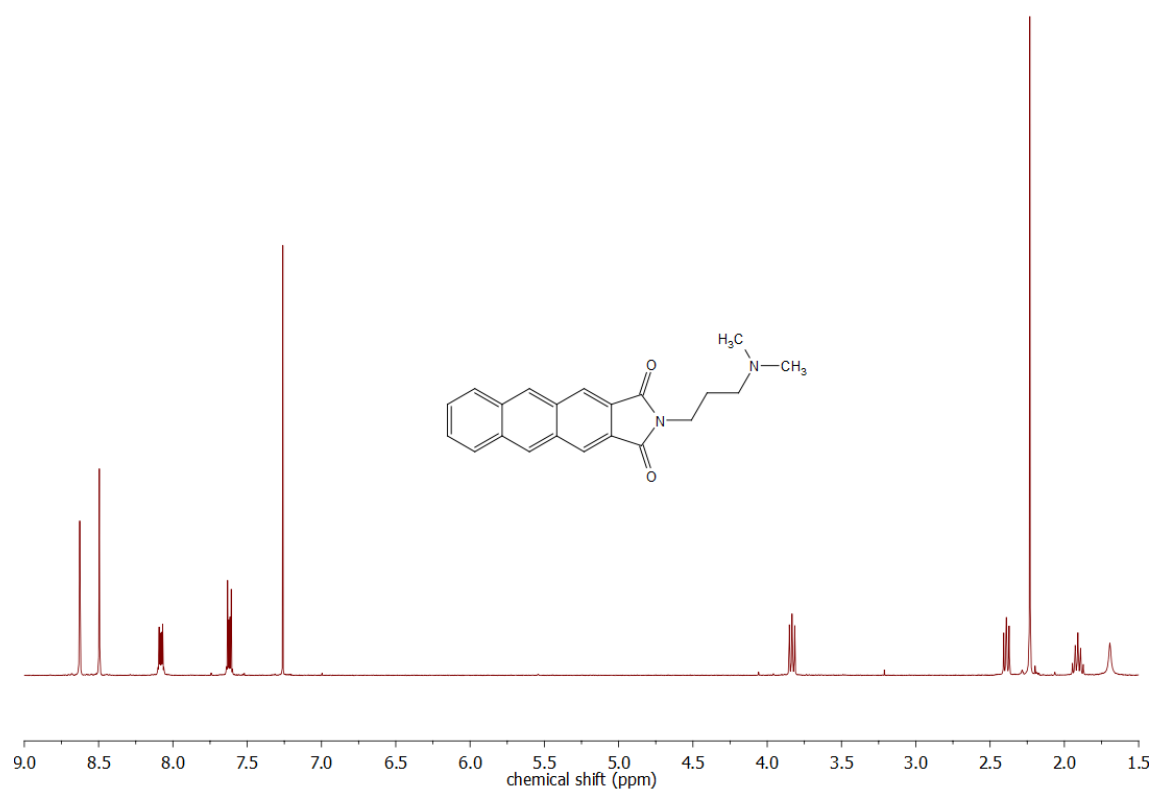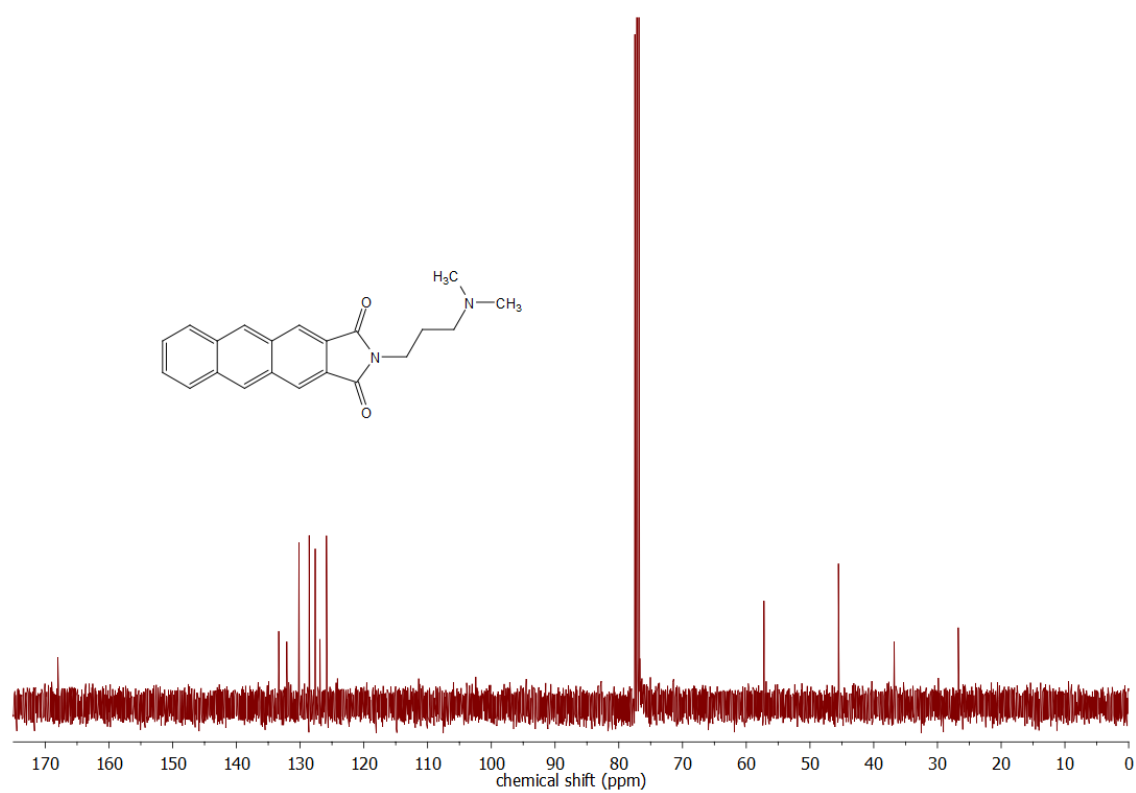

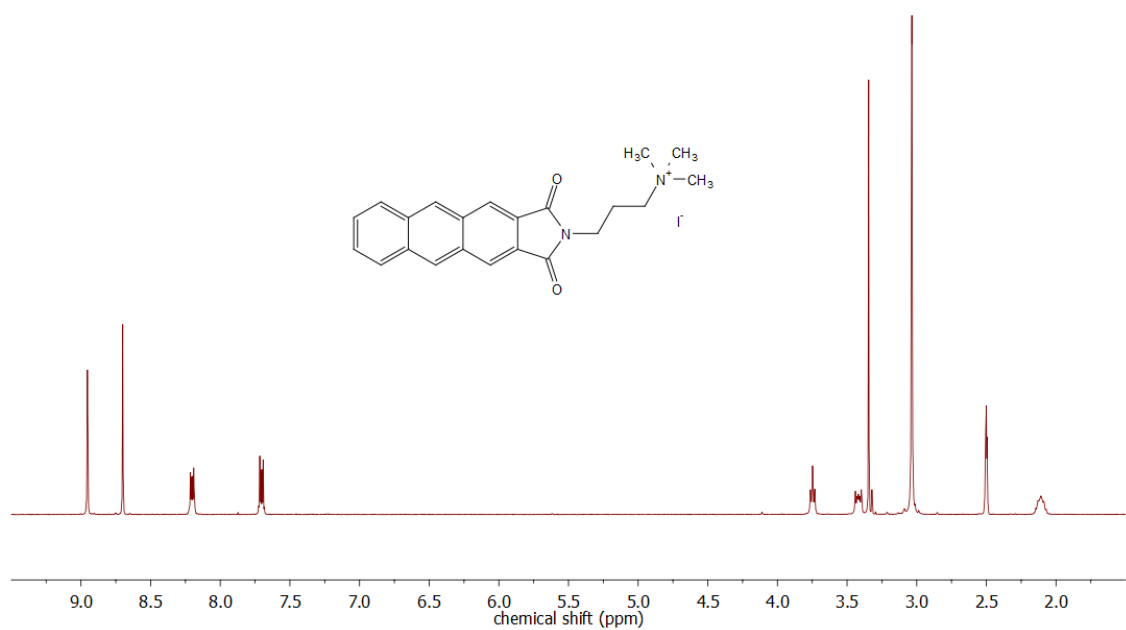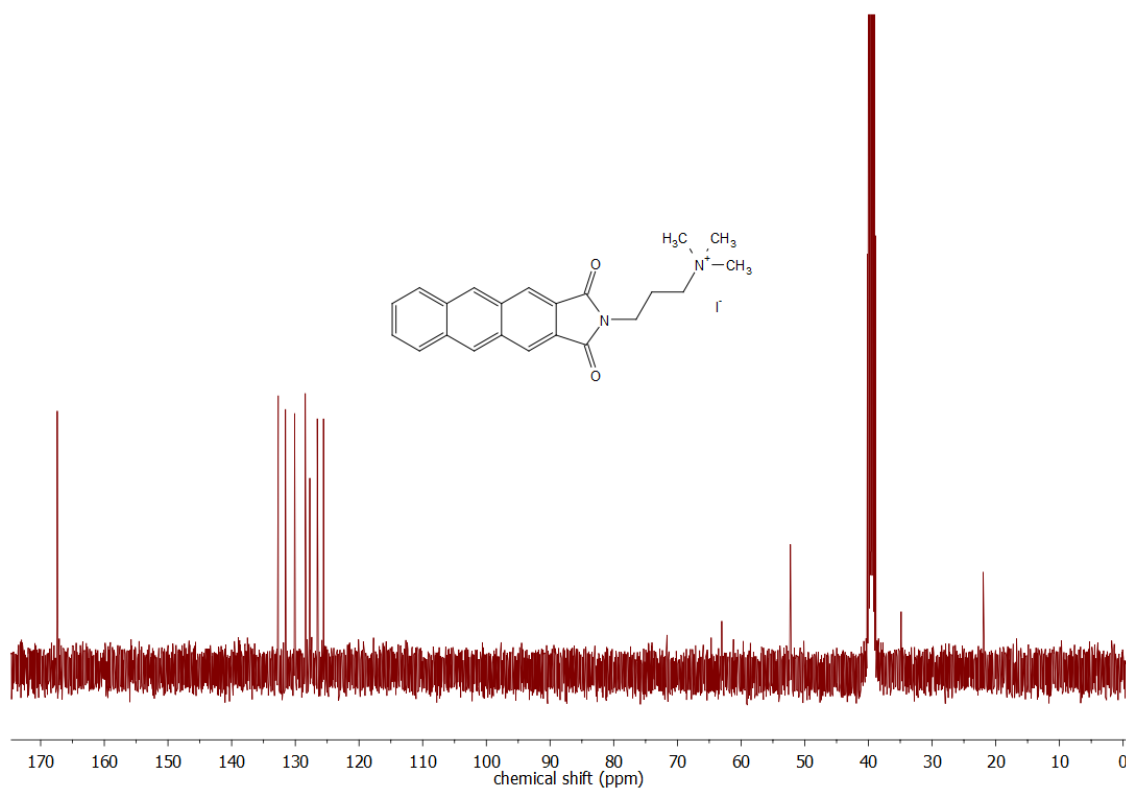

## References

1. C. Márquez, F. Huang and W. M. Nau, *IEEE Trans. Nanobiosci.*, 2004, **3**, 39-45.
2. W. H. Melhuish, *J. Phys. Chem.*, 1960, **64**, 762-764.
3. W. H. Melhuish, *J. Phys. Chem.*, 1961, **65**, 229-235.



4. J. Vázquez, P. Remón, R. N. Dsouza, A. I. Lazar, J. F. Arteaga, W. M. Nau and U. Pischel, *Chem. Eur. J.*, 2014, **20**, 9897-9901.
5. H. Bakirci and W. M. Nau, *J. Photochem. Photobiol. A: Chem.*, 2005, **173**, 340-348.
6. H. Bakirci, X. Zhang and W. M. Nau, *J. Org. Chem.*, 2005, **70**, 39-46.
